# Supplementary material
Source: PubMed Central journal article supplement (PMC4697747)

SI Figure.1 Full scan of blots and gels

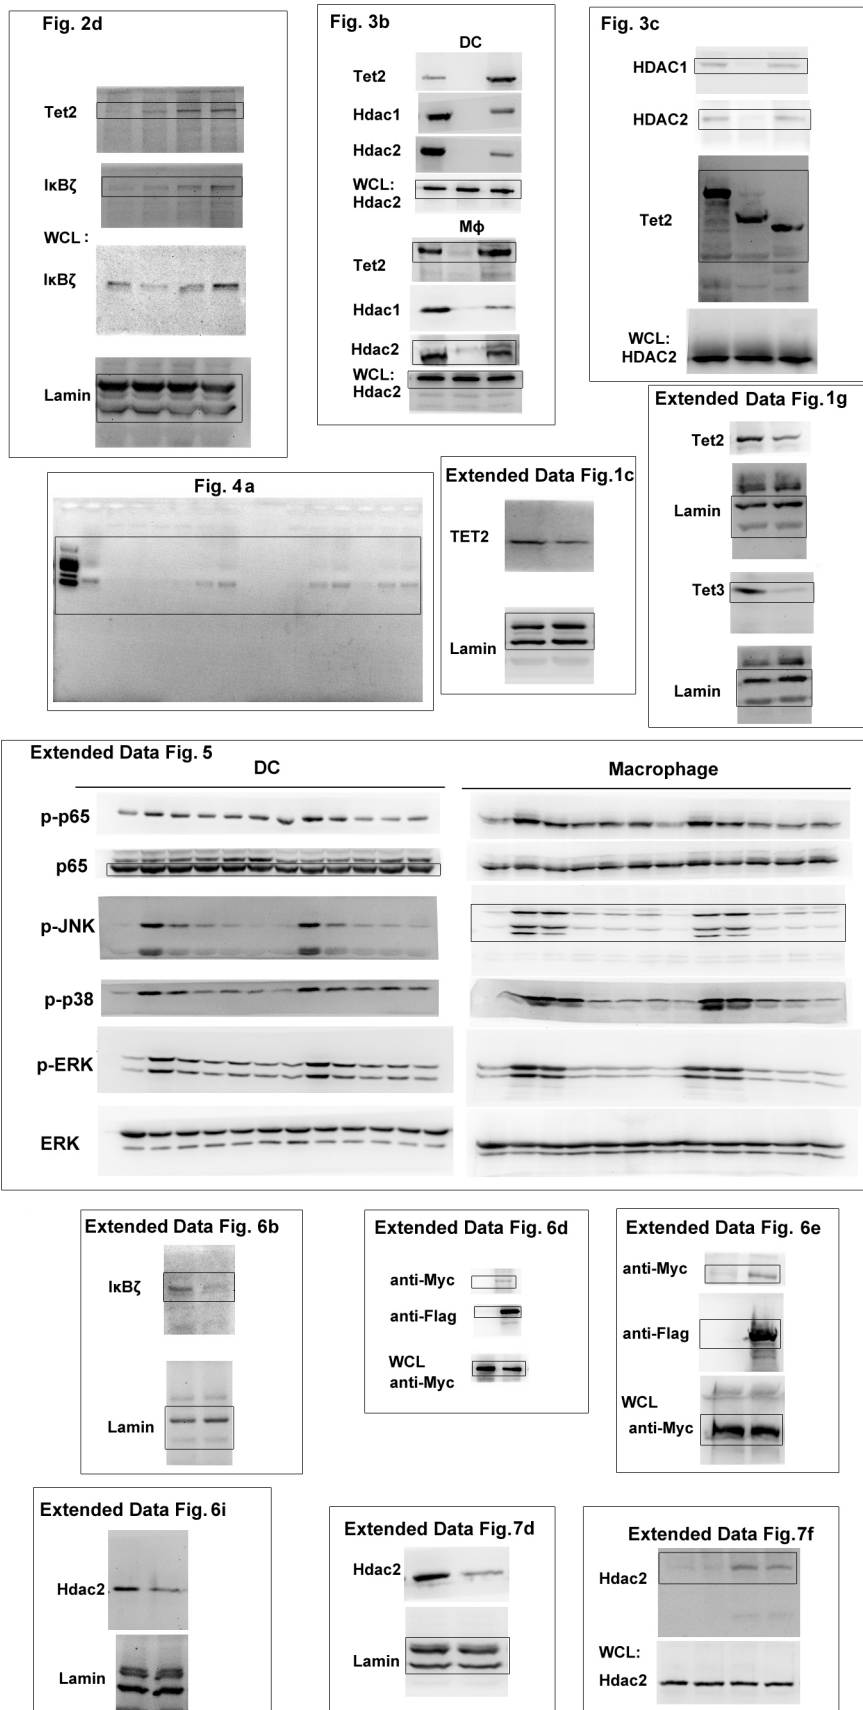

Supplement: NIHMS746071-supplement-Supplementary_Information.pdf [file NIHMS746071-supplement-Supplementary_Information.pdf]
